# Supplementary material for: Assembly of the Type II Secretion System such as Found in Vibrio cholerae Depends on the Novel Pilotin AspS
Source: PLOS journal article supplement (doi:10.1371/journal.ppat.1003117), 2013-01-10
Supplement: S6 (10.1371/journal.ppat.1003117.s006) [file journal.ppat.1003117.s006]

**Supplementary Table S1: Strains and plasmids used in this study.**

|                                      | <b>Description</b>                                                                     | <b>Reference</b>          |
|--------------------------------------|----------------------------------------------------------------------------------------|---------------------------|
| <b>Strain</b>                        |                                                                                        |                           |
| E2348/69                             | EPEC serotype O127:H6                                                                  | Levine et al 1978         |
| E2348/69 $\Delta gspD$               | E2348/69 $\Delta gspD$                                                                 | Baldi et al 2012          |
| E2348/69 $\Delta sslE$               | E2348/69 $\Delta sslE$                                                                 | Baldi et al 2012          |
| E2348/69 $\Delta yacC$               | E2348/69 $\Delta yacC$                                                                 | This Study                |
| E2348/69 $\Delta aspS$               | E2348/69 $\Delta aspS$                                                                 | This Study                |
| E2348/69 $\Delta gspD \Delta yacC$   | E2348/69 $\Delta gspD \Delta yacC$                                                     | This Study                |
| E2348/69 $\Delta gspD \Delta aspS$   | E2348/69 $\Delta gspD::Cm^r, \Delta aspS$                                              | This Study                |
| BL21 (DE3)                           | <i>E. coli</i> strain: F- <i>ompT hsdSB</i> (rB- mB-) <i>dcm gal</i> (DE3)             | Invitrogen                |
| BL21 (DE3) $\Delta gspD \Delta aspS$ | BL21 (DE3) $\Delta gspD::Cm^r, \Delta aspS$                                            | This Study                |
| Rosetta (DE3)                        | <i>E. coli</i> strain: F- <i>ompT hsdSB</i> (rB- mB-) <i>dcm gal</i> (DE3)             | Novagen                   |
| <b>Plasmid</b>                       |                                                                                        |                           |
| pBAD24                               | <i>ori</i> pMB1, Amp <sup>r</sup>                                                      | Guzman et al 1995         |
| pET DUET-1                           | <i>ori ColE1, lacI</i> gene, Amp <sup>r</sup> , used for assembly assays in BL21(DE3)  | Novagen                   |
| pET DUET-1 GspD-C <sub>4</sub>       | E2348/69 <i>gspD-C<sub>4</sub></i> was cloned into NcoI/HindIII sites of pET DUET-1    | This Study                |
| pET DUET-1 GspD-C <sub>4</sub> YacC  | E2348/69 <i>yacC</i> was cloned into NdeI/XhoI sites of pET DUET-1 GspD-C <sub>4</sub> | This Study                |
| pET DUET-1 GspD-C <sub>4</sub> AspS  | E2348/69 <i>aspS</i> was cloned into NdeI/XhoI sites of pET DUET-1 GspD-C <sub>4</sub> | This Study                |
| pFT-A                                | <i>ori</i> R101, <i>repA101ts, flp</i> , Amp <sup>r</sup>                              | Posfai et al 1997         |
| pGEM-T-Easy                          | <i>ori</i> pMB1, Amp <sup>r</sup>                                                      | Promega                   |
| pKD3                                 | FRT flanked Cm <sup>r</sup> gene, Cm <sup>r</sup> , Amp <sup>r</sup>                   | Datsenko and Wanner, 2000 |

|         |                                                                                                                                                                                                                                                                                                                                                |                           |
|---------|------------------------------------------------------------------------------------------------------------------------------------------------------------------------------------------------------------------------------------------------------------------------------------------------------------------------------------------------|---------------------------|
| pKD4    | FRT flanked Kan <sup>r</sup> gene, Kan <sup>r</sup> , Amp <sup>r</sup>                                                                                                                                                                                                                                                                         | Datsenko and Wanner, 2000 |
| pKD46   | λ Red recombinase, <i>ori</i> R101, <i>repA101ts</i> , Amp <sup>r</sup>                                                                                                                                                                                                                                                                        | Datsenko and Wanner, 2000 |
| pJP117  | E2348/69 <i>gspD-C<sub>4</sub></i> is cloned into the <i>NcoI/XbaI</i> sites of pNM12 (pBAD24 modified to include <i>MscI</i> site). Used for assembly assays in E2348/69                                                                                                                                                                      | This Study                |
| pJP168  | P <sub>BAD</sub> promoter and <i>araC</i> replaced by P <sub>tetA</sub> and <i>tetR</i>                                                                                                                                                                                                                                                        | Baldi et al 2012          |
| pJP181  | E2348/69 <i>gspD-C<sub>4</sub></i> is cloned into the <i>NcoI/HindIII</i> sites of pJP168. Used for sucrose fractionation in E2348/69.                                                                                                                                                                                                         | This Study                |
| pKV1066 | H10407 <i>yghG</i> was cloned into a modified pET-22b(+) vector (Novagen) to encode <i>pelB</i> periplasmic signal sequence, His <sub>6</sub> tag and tobacco etch virus protease cleavage site; <i>ori ColE1</i> , <i>lacI</i> gene, Amp <sup>r</sup> ; used for binding assay with the secretin S-domain                                     | This study                |
| pKV1111 | Sequence corresponding to 60 C-terminal residues of H10407 <i>gspD</i> (S-domain) was cloned into a pET-22b(+) vector to encode a fusion with <i>malE</i> gene; <i>ori ColE1</i> , <i>lacI</i> gene, Amp <sup>r</sup> ; used for binding assay with the pilotin                                                                                | This study                |
| pKV1112 | VC395_1831 from <i>V. cholerae</i> 569B (corresponds to VC1703 from <i>V. cholerae</i> O1 biovar El Tor str. N16961) was cloned into a modified pET-22b(+) vector to encode <i>pelB</i> periplasmic signal sequence, His <sub>6</sub> tag and tobacco etch virus protease cleavage site; <i>ori ColE1</i> , <i>lacI</i> gene, Amp <sup>r</sup> | This study                |

## REFERENCES

Baldi DL, Higginson EE, Hocking DM, Praszquier J, Cavaliere R et al. (2012) The Type II Secretion System and Its Ubiquitous Lipoprotein Substrate, SslE, Are Required for Biofilm Formation and Virulence of Enteropathogenic *Escherichia coli*. *Infect Immun* 80: 2042-2052

Guzman LM, Belin D, Carson MJ, Beckwith J (1995) Tight regulation, modulation, and high-level expression by vectors containing the arabinose PBAD promoter. *J Bacteriol* 177: 4121-4130

Levine MM, Bergquist EJ, Nalin DR, Waterman DH, Hornick RB, et al. (1978) *Escherichia coli* strains that cause diarrhoea but do not produce heat-labile or heat-stable enterotoxins and are non-invasive. *Lancet* 1: 1119-1122

Posfai G, Koob MD, Kirkpatrick HA, Blattner FR (1997) Versatile insertion plasmids for targeted genome manipulations in bacteria: isolation, deletion, and rescue of the pathogenicity island LEE of the *Escherichia coli* O157:H7 genome. *J Bacteriol* 179: 4426-4428

Datsenko KA, Wanner BL (2000) One-step inactivation of chromosomal genes in *Escherichia coli* K-12 using PCR products. *Proc. Natl. Acad. Sci. U.S.A.* 97: 6640-6645
